# Supplementary material for: Selective Ammonia-Sensing Platforms Based on a Solution-Processed Film of Poly(3-Hexylthiophene) and p-Doping Tris(Pentafluorophenyl)Borane
Source: MDPI journal article supplement (doi:10.3390/polym12010128), 2020-01-05
Supplement: s1 [file s1]

Supporting Information

# Selective Ammonia-Sensing Platforms Based on a Solution-Processed Film of Poly(3-Hexylthiophene) and p-Doping Tris(Pentafluorophenyl)Borane

Alem Araya Meresa and Felix Sunjoo Kim \*

School of Chemical Engineering and Materials Science, Chung-Ang University, Seoul 06974, Korea; alemaraya12man@gmail.com

\* Correspondence: fskim@cau.ac.kr; Tel.: +82-2-820-5200

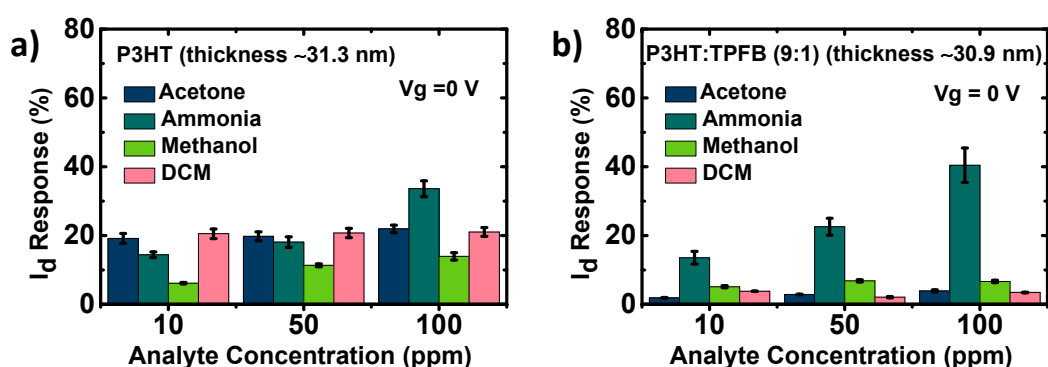

**Figure S1.** Selectivity of sensors made from thin polymer films: (a) P3HT and (b) P3HT:TPFB=9:1. The current was recorded at the gate voltage of 0 V. The film thickness was controlled to be ~31 nm.

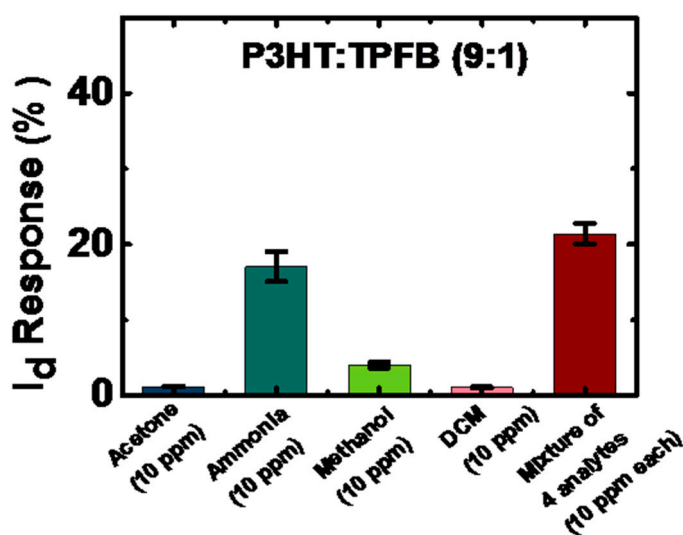

**Figure S2.** Percentage current responses of the P3HT:TPFB (9:1) devices for individual analyte at 10 ppm and the mixture of four analytes (10 ppm each). The current was recorded at the gate voltage of -100 V.

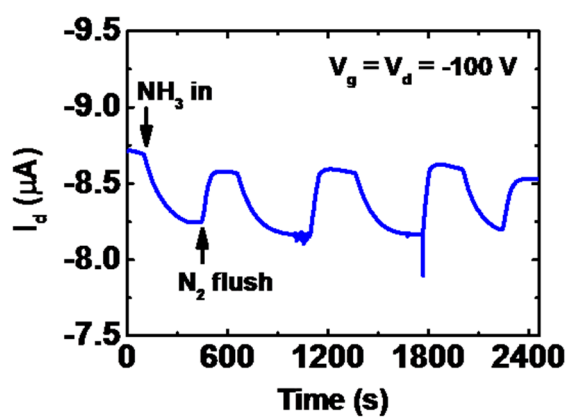

**Figure S3.** Real-time responses of a P3HT:TPFB (9:1) device during multi-cycling of sequential exposure to  $\text{NH}_3$  (10 ppm) and  $\text{N}_2$ -gas flush. The current was recorded at the drain and gate voltages of  $-100 \text{ V}$ .

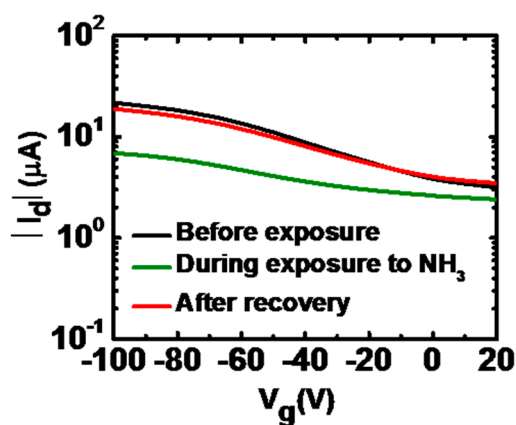

**Figure S4.** Transfer curves of a P3HT:TPFB (9:1) device before  $\text{NH}_3$  exposure, during  $\text{NH}_3$  exposure, and after recovery in  $\text{N}_2$  environment.

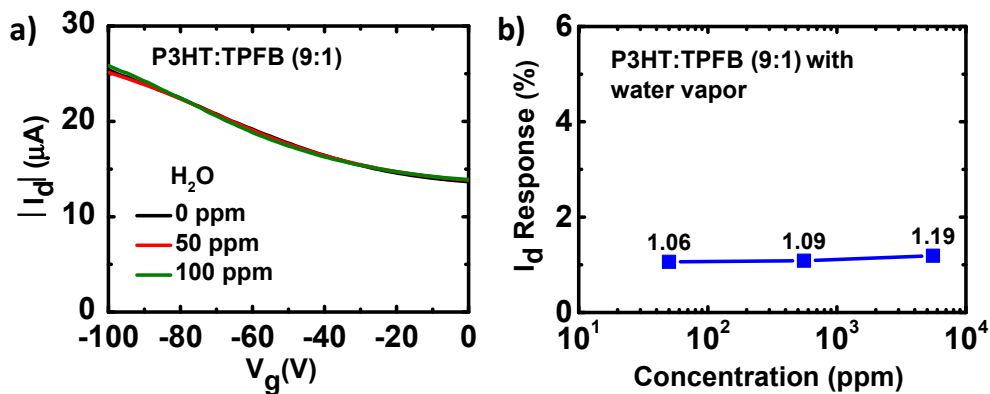

**Figure S5.** (a) Transfer curves of a P3HT:TPFB (9:1) device in water vapor. (b) Percentage current responses of a P3HT:TPFB (9:1) device to a various concentration of  $H_2O$  vapor. The current was recorded at the gate voltage of  $-100$  V.

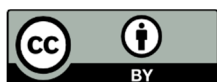

© 2020 by the authors. Licensee MDPI, Basel, Switzerland. This article is an open access article distributed under the terms and conditions of the Creative Commons Attribution (CC BY) license (<http://creativecommons.org/licenses/by/4.0/>).
